# Supplementary material for: Comparative analysis of the Rotarix™ vaccine strain and G1P[8] rotaviruses detected before and after vaccine introduction in Belgium
Source: PubMed Central journal article supplement (PMC5214804; doi:10.7717/peerj.2733), 2017-01-03
Supplement: peerj-05-2733-s001.pdf [file peerj-05-2733-s001.pdf]

| <b>Gene segment</b> | <b>Primer name</b> | <b>Primer sequences</b>               |
|---------------------|--------------------|---------------------------------------|
| VP1                 | GEN_VP1Fb          | 5'-GGCTATTAAGCTRTACAATGGGGAAG-3'      |
|                     | GEN_VP1Rb          | 5'-GGTCACATCTAAGCGYTCTAATCTTG-3'      |
| VP2                 | GEN_VP2Fc          | 5'-GGCTATTAAGGYTCAATGGCGTACAG-3'      |
|                     | GEN_VP2_Rbc        | 5'-GTCATATCTCCACARTGGGGTTGG-3'        |
| VP3                 | GEN_VP3Fe          | 5'-GGCTWTTAAAGCARTATTAGTAGTG-3'       |
|                     | GEN_VP3_2584R      | 5'-TGACYAGTGTGTTAAGTTTTYTAGC-3'       |
| VP4                 | VP4-1-17F          | 5'-GGCTATAAAATGGCTTCGC-3'             |
|                     | GEN_VP4_P8_2328R   | 5'-CATTGTAGAATTARYTGTTCAATTCTATTCC-3' |
| VP6                 | GEN_VP6F           | 5'-GGCTTTWAAACGAAGTCTTC-3             |
|                     | GEN_VP6R           | 5'-GGTCACATCCTCTCACT-3'               |
| VP7                 | BEG9               | 5'-GGCTTTAAAAGAGAGAATTTCCGTCTGG-3'    |
|                     | END9               | 5'-GGTCACATCATACAATTCTAATCTAAG-3'     |
| NSP1                | GEN_NSP1F          | 5'-GGCTTTTTTTTTATGAAAAGTCTTG-3'       |
|                     | GEN_NSP1R          | 5'-GGTCACATTTTATGCTGCC-3'             |
| NSP2                | GEN_NSP2F          | 5'-GGCTTTTAAAGCGTCTCAG-3'             |
|                     | GEN_NSP2R          | 5'-GGTCACATAAGCGCTTTC-3'              |
| NSP3                | GEN_NSP3F          | 5'-GGCTTTTAATGCTTTTCAGTG-3'           |
|                     | GEN_NSP3R          | 5'-ACATAACGCCCTATAGC-3'               |
| NSP4                | GEN_NSP4F          | 5'-GGCTTTTAAAAGTTCTGTTCC-3'           |
|                     | GEN_NSP4R          | 5'-GGWYACRYTAAGACCRTTCC-3'            |
| NSP5                | GEN_NSP5F          | 5'-GGCTTTTAAAGCGCTACAG-3'             |
|                     | GEN_NSP5R          | 5'-GGTCACAAAACGGGAGT-3'               |
