# Supplementary material for: Comparative analysis of the Rotarix™ vaccine strain and G1P[8] rotaviruses detected before and after vaccine introduction in Belgium
Source: PubMed Central journal article supplement (PMC5214804; doi:10.7717/peerj.2733), 2017-01-03

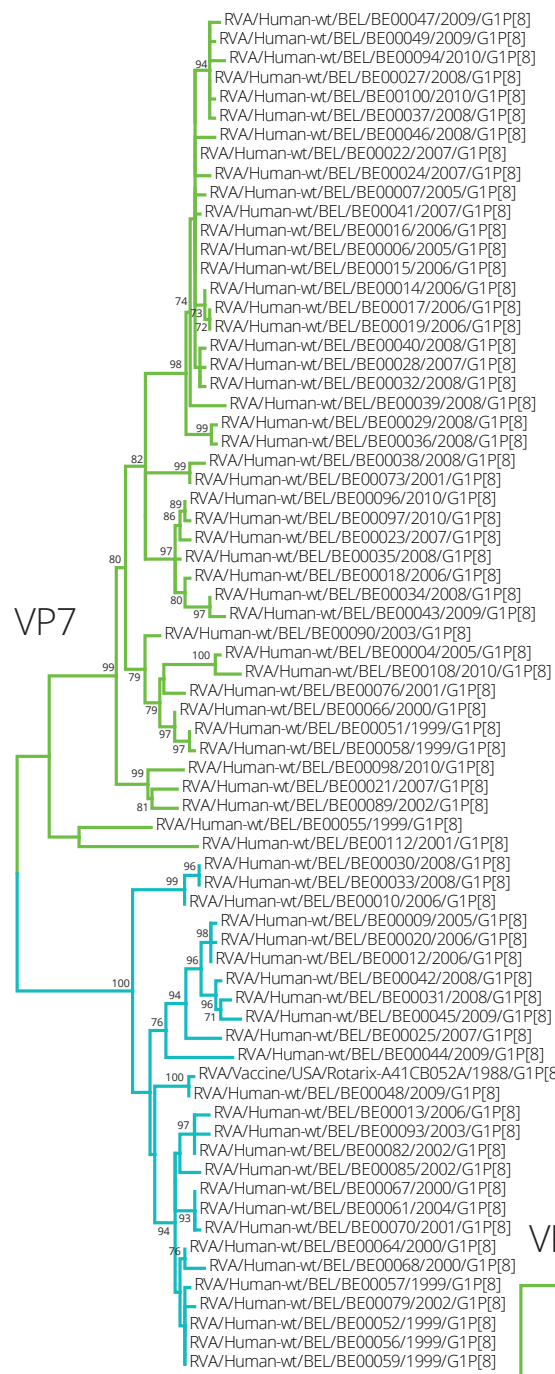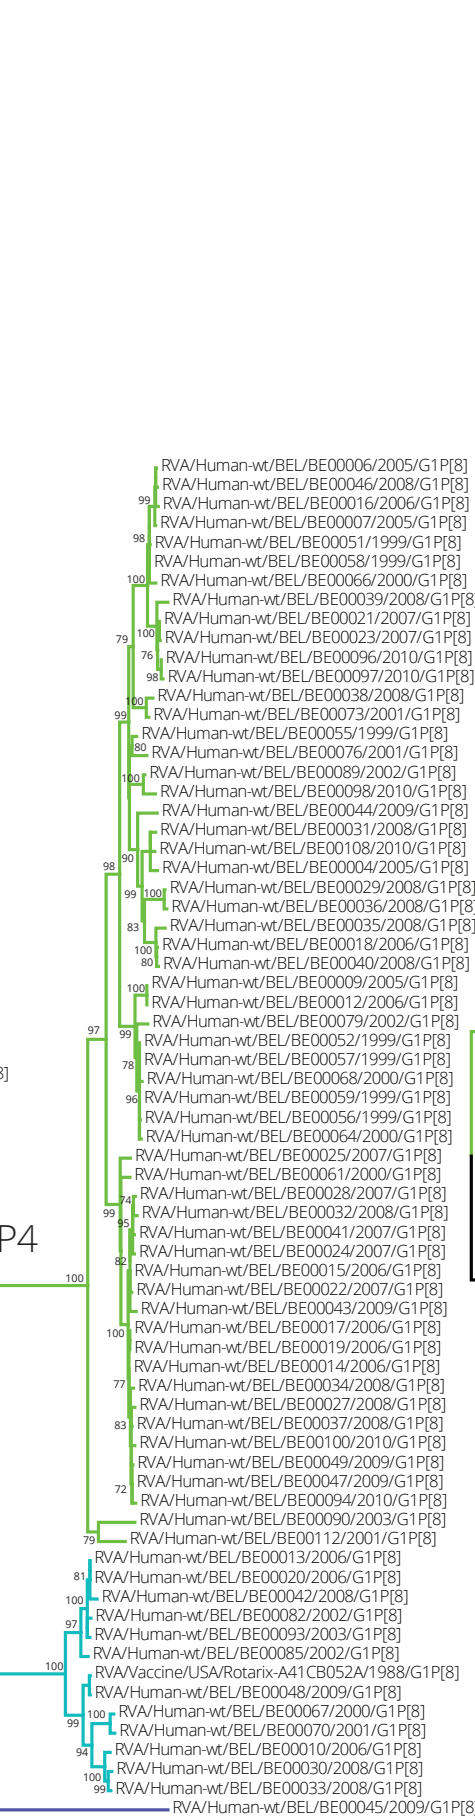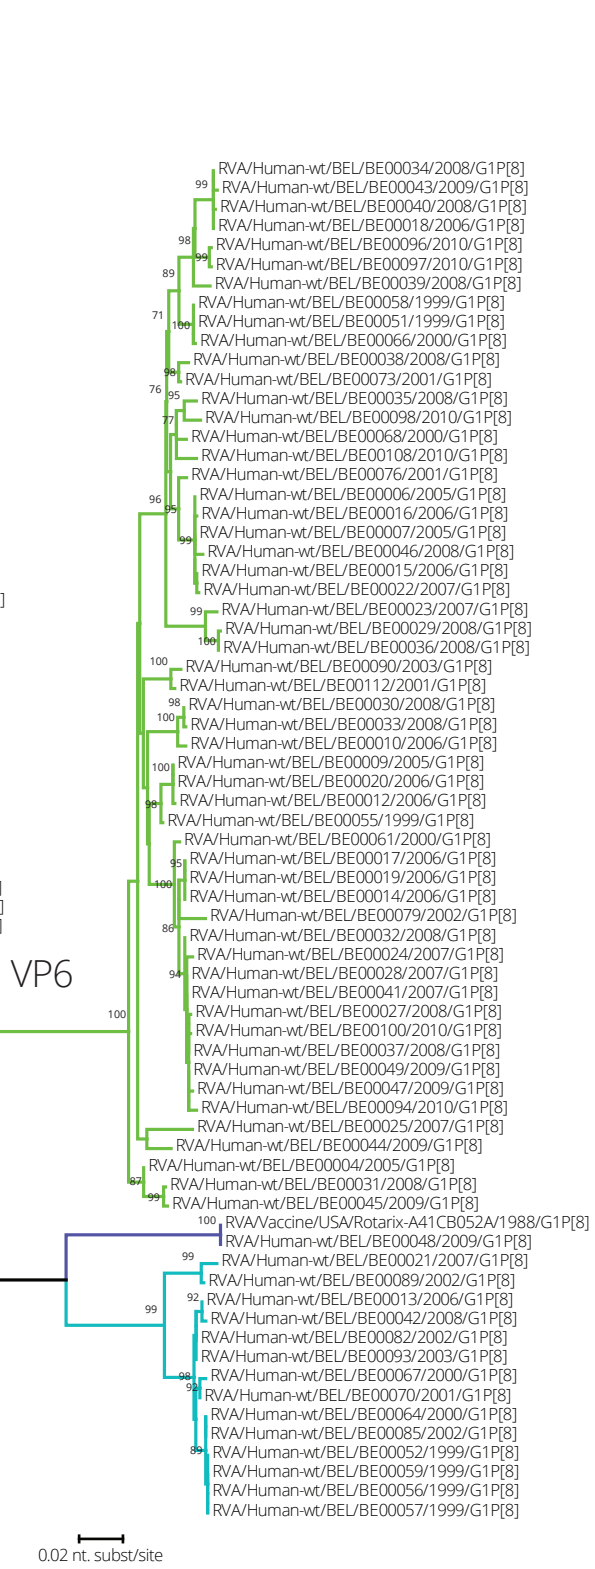

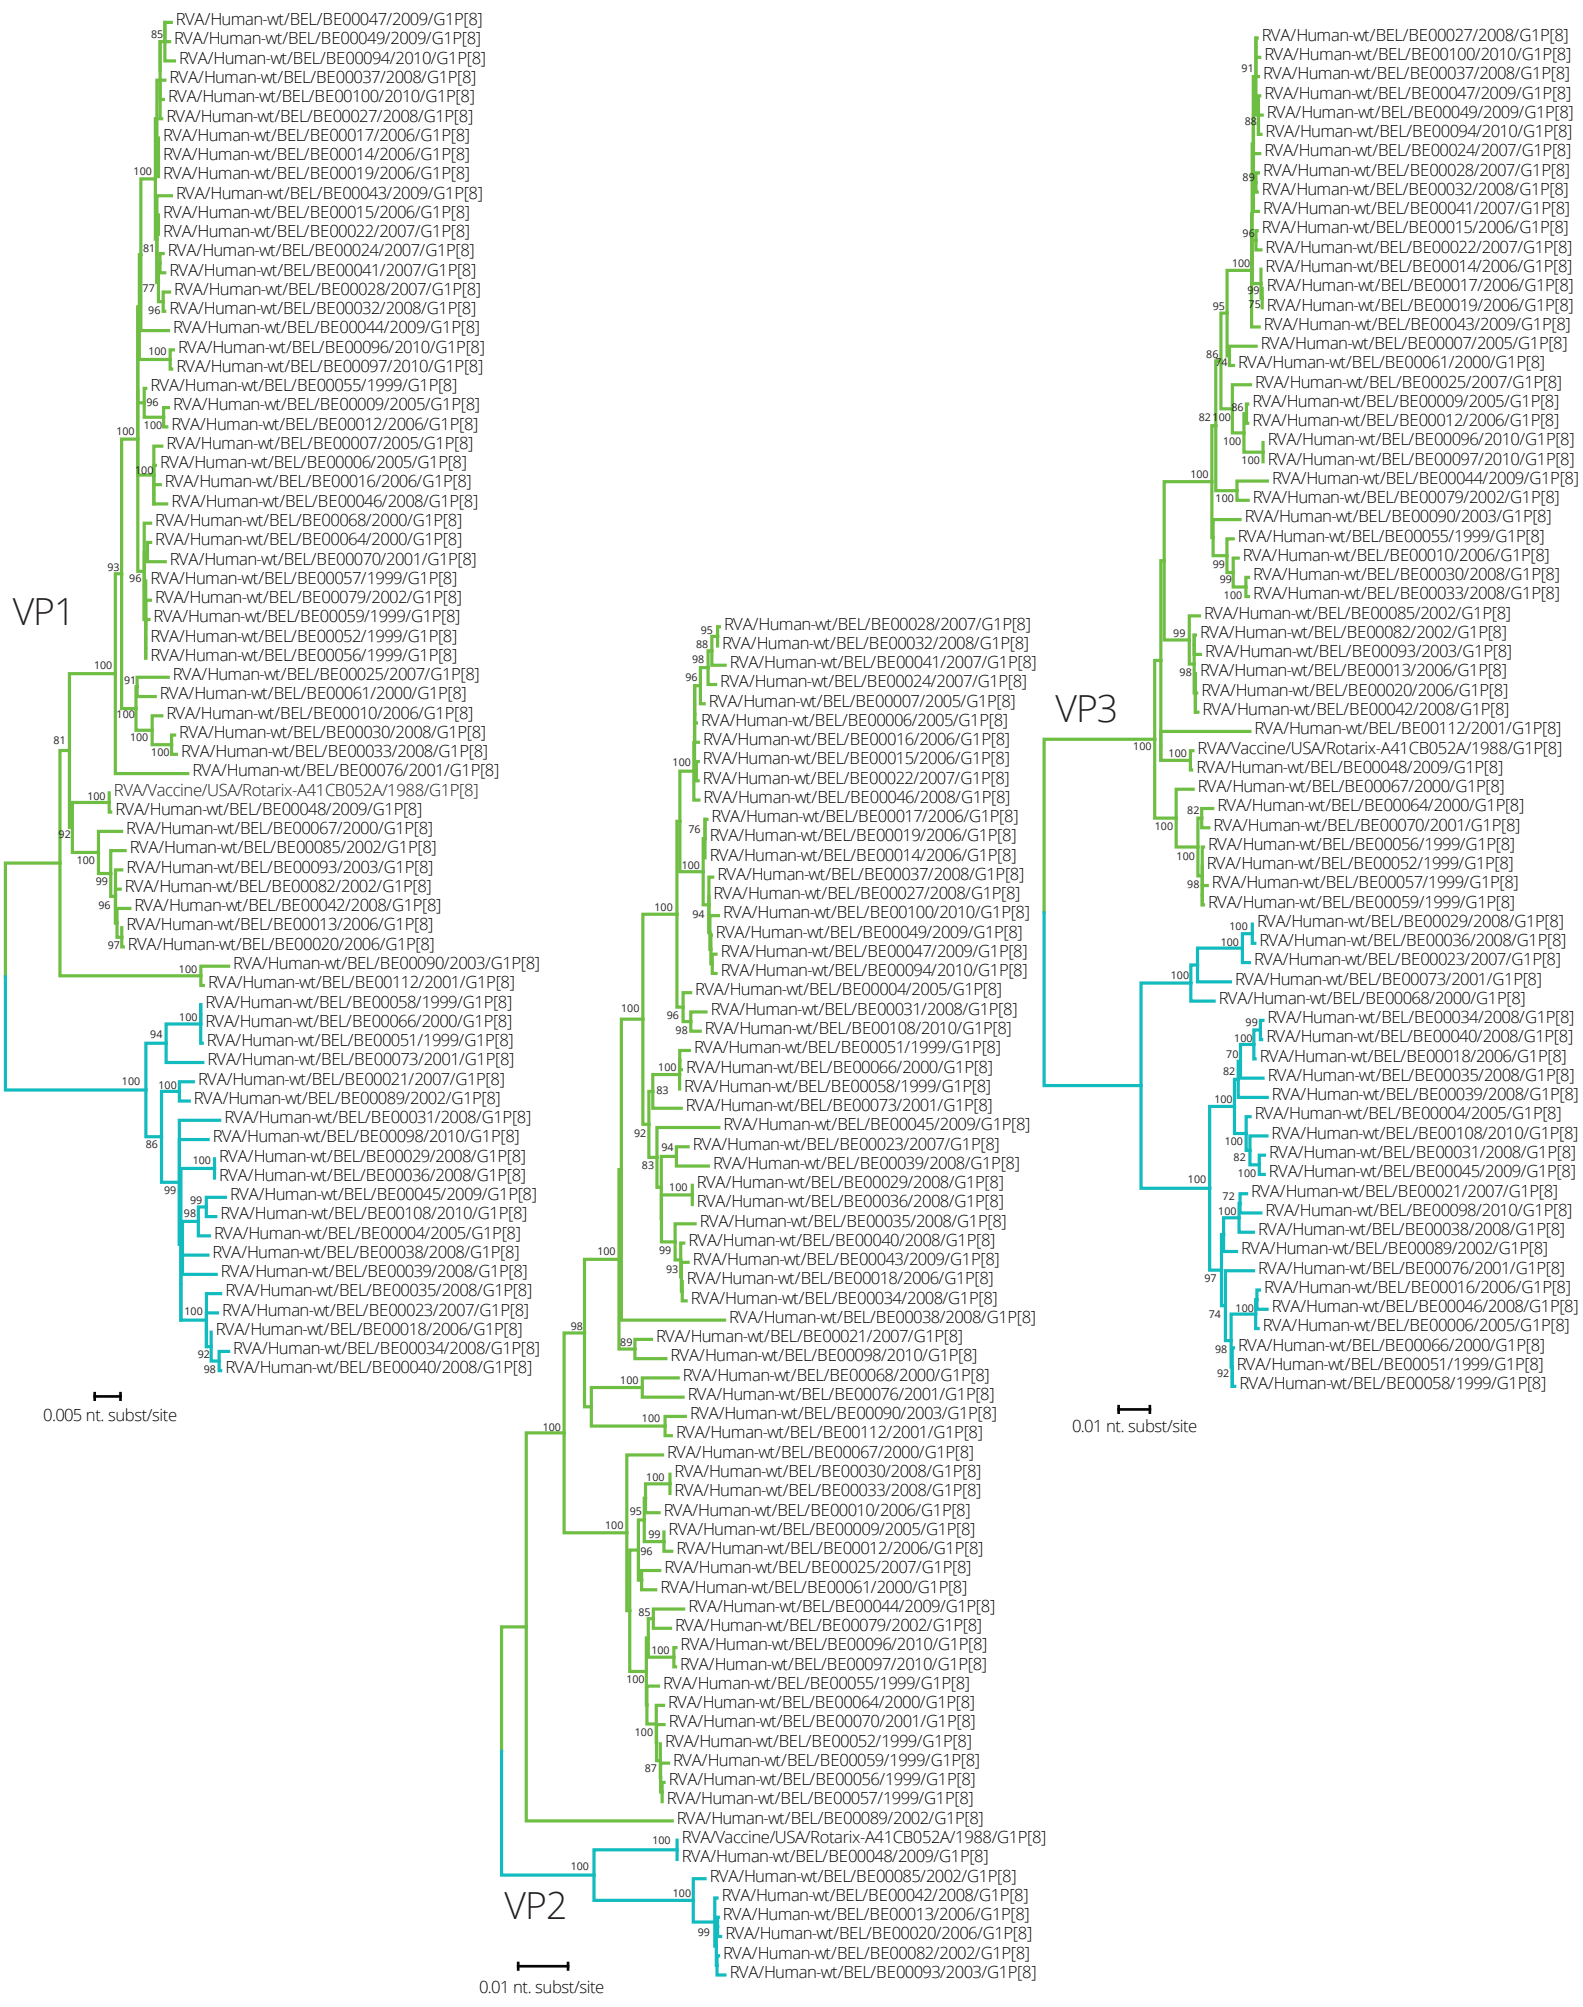

VP1

VP3

VP2

0.005 nt. subst/site

0.01 nt. subst/site

0.01 nt. subst/site

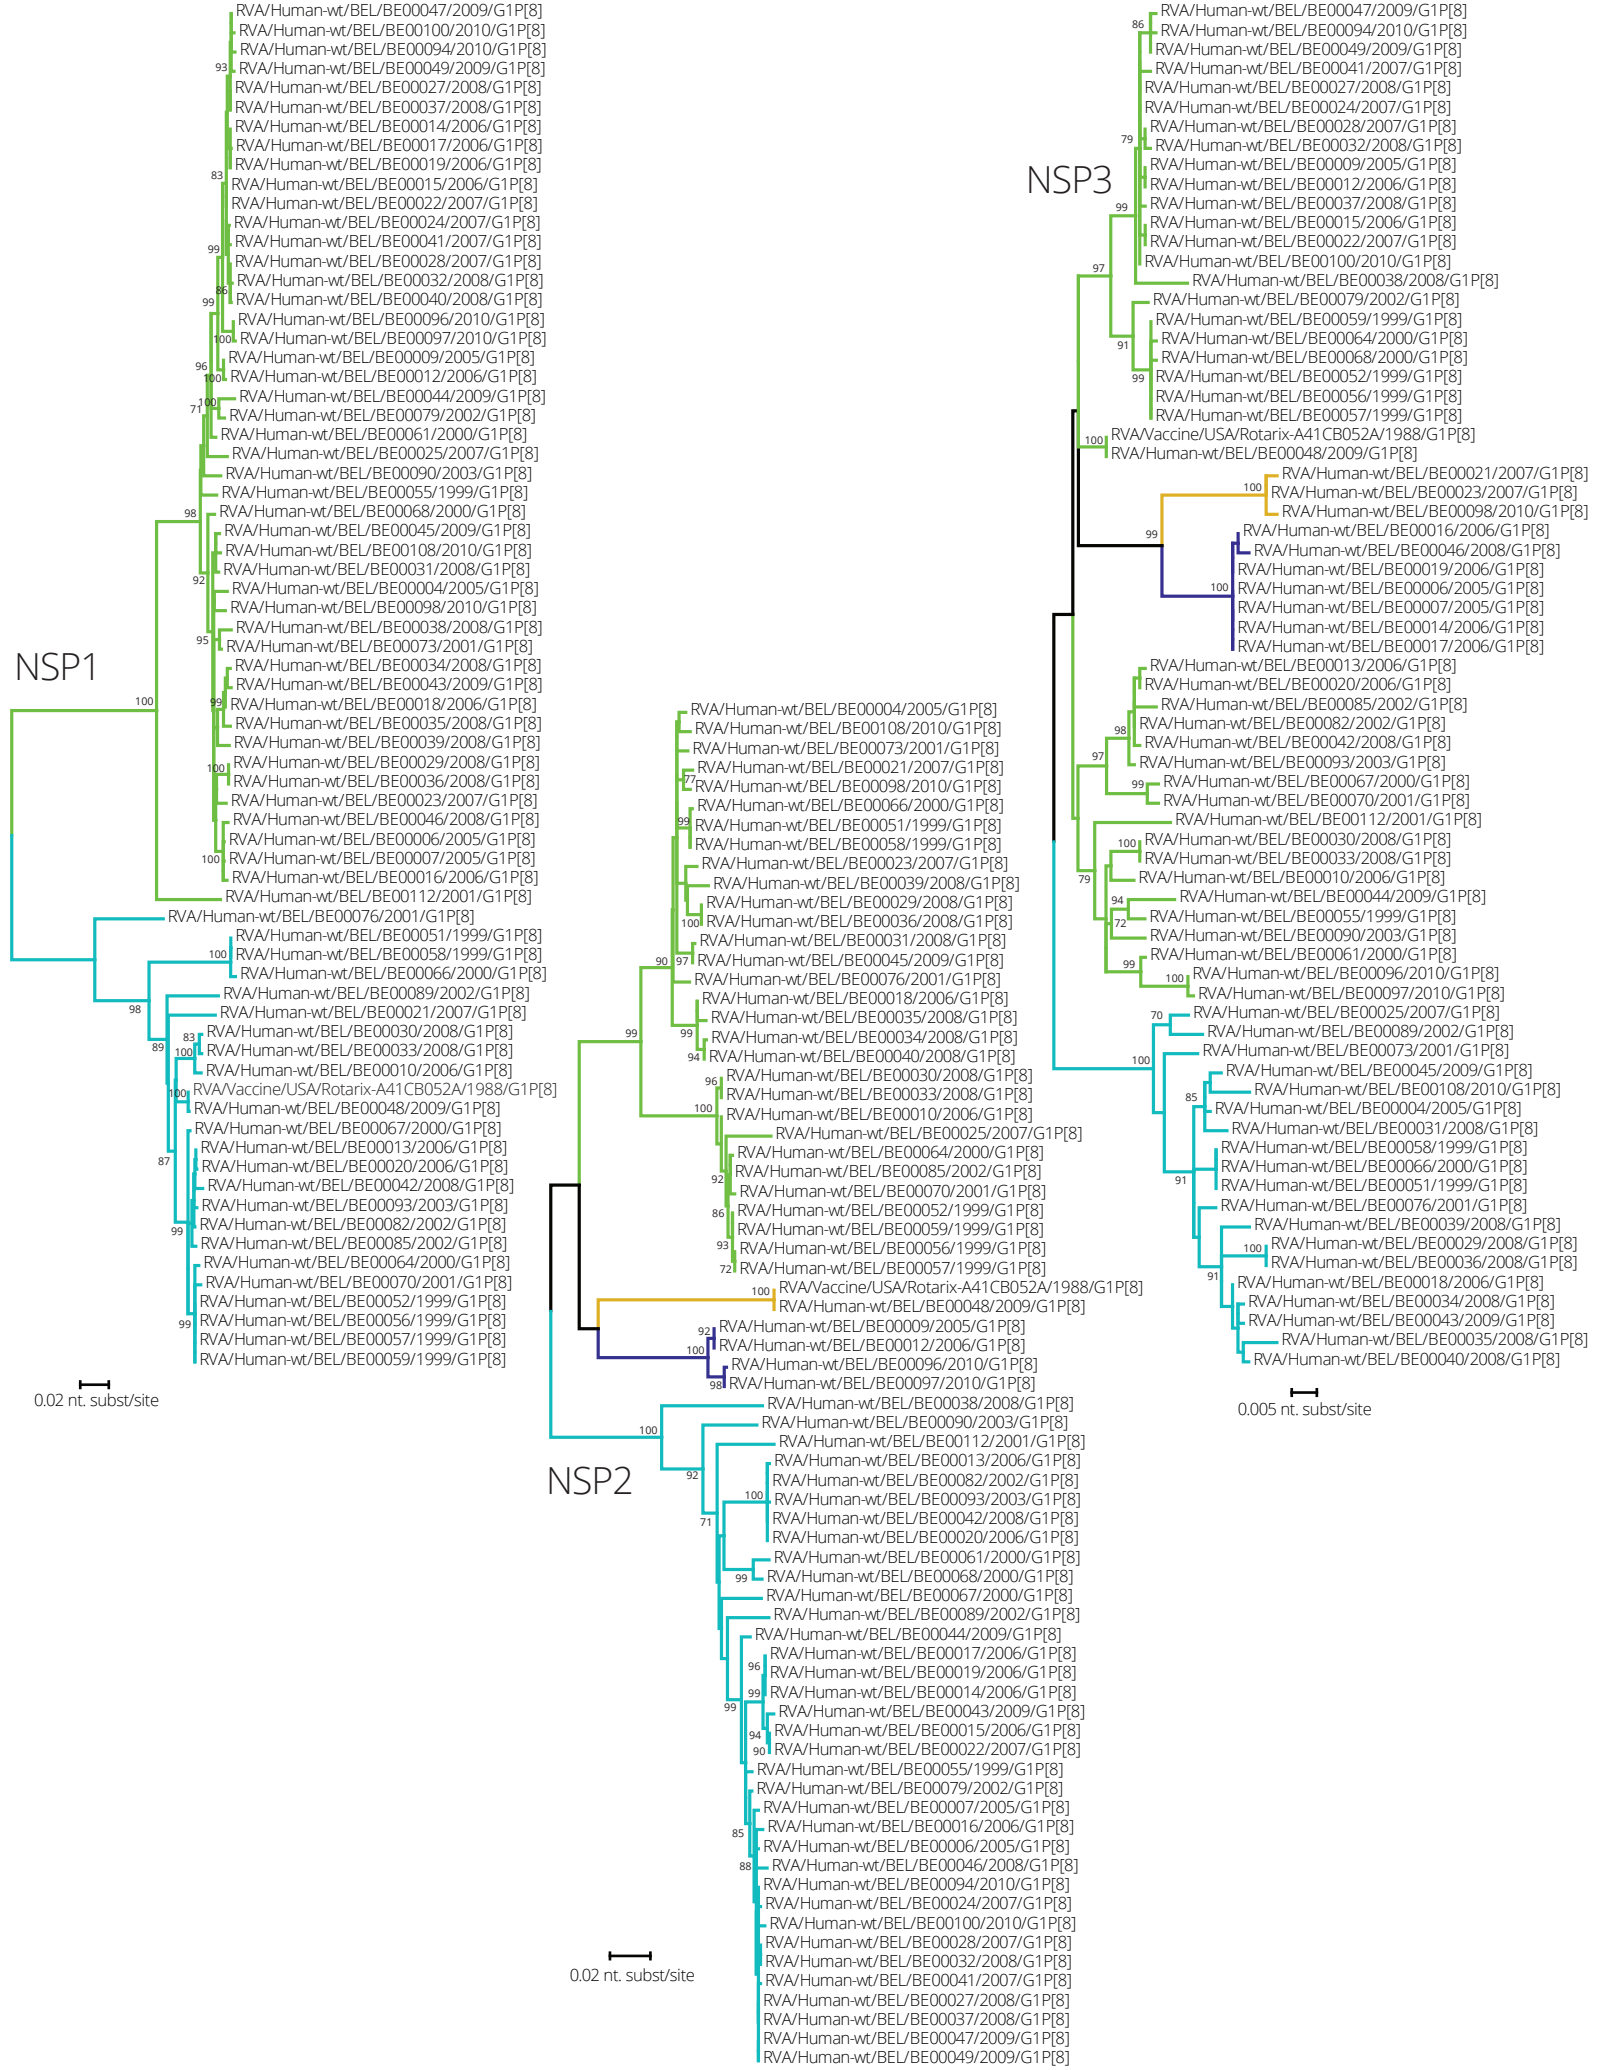

Supplement: peerj-05-2733-s002.pdf [file peerj-05-2733-s002.pdf]
